# Supplementary material for: Relationship between the endothelial dysfunction and the expression of the β1-subunit of BK channels in a non-hypertensive sleep apnea group
Source: PubMed Central journal article supplement (PMC6584007; doi:10.1371/journal.pone.0217138), 2019-06-19
Supplement: pone.0217138.s002.pdf [file pone.0217138.s002.pdf]

S1 Table

| PARAMETERS                                                                      | MEASURE:                                                                                                                         | Better endothelial function when: |
|---------------------------------------------------------------------------------|----------------------------------------------------------------------------------------------------------------------------------|-----------------------------------|
| <b>Hyperemia area (%)</b><br><b>Area under the curve (PU/s)</b>                 | Speed<br>Intensity<br>Duration  of the response | Higher                            |
| <b>Slope (PU/s)</b>                                                             | Speed of the response                                                                                                            | Lower                             |
| <b>Latency time (s)</b><br><b>Recovery time(s)</b><br><b>Time to maximum(s)</b> | Speed of the response                                                                                                            | Lower                             |
