# Supplementary material for: Relationship between the endothelial dysfunction and the expression of the β1-subunit of BK channels in a non-hypertensive sleep apnea group
Source: PubMed Central journal article supplement (PMC6584007; doi:10.1371/journal.pone.0217138), 2019-06-19
Supplement: pone.0217138.s004.pdf [file pone.0217138.s004.pdf]

S3 Table.

|                             | <b>AHI</b>             | <b>ODI</b>            | <b>T90%</b>           | <b>Basal SpO<sub>2</sub> (%)</b> | <b>Average SpO<sub>2</sub> (%)</b> | <b>Minimum SpO<sub>2</sub> (%)</b> |
|-----------------------------|------------------------|-----------------------|-----------------------|----------------------------------|------------------------------------|------------------------------------|
| <b>Hyperemia area (PU)</b>  | r = 0,03<br>p = 0,91   | r = 0,32<br>p = 0,88  | r = 0,16<br>p = 0,46  | r = - 0,27<br>p = 0,23           | r = - 0,08<br>p = 0,72             | r = - 0,33<br>p = 0,18             |
| <b>AUC (PU/s)</b>           | r = - 0,27<br>p = 0,20 | r = -0,32<br>p = 0,15 | r = -0,35<br>p = 0,11 | r = 0,25<br>p = 0,27             | r = 0,37<br>p = 0,09               | r = 0,35<br>p = 0,16               |
| <b>Slope(PU/s)</b>          | r = 0,26<br>p = 0,26   | r = 0,33<br>p = 0,15  | r = 0,48<br>p = 0,03  | r = - 0,42<br>p = 0,06           | r = - 0,50<br>p = 0,02             | r = - 0,63<br>p = 0,007            |
| <b>Time to latency(s)</b>   | r = 0,13<br>p = 0,72   | r = 0,20<br>p = 0,6   | r = 0,08<br>p = 0,83  | r = - 0,49<br>p = 0,17           | r = - 0,09<br>p = 0,93             | r = - 0,07<br>p = 0,87             |
| <b>Time to recovery (s)</b> | r = 0,31<br>p = 0,91   | r = 0,02<br>p = 0,92  | r = 0,13<br>p = 0,58  | r = 0,05<br>p = 0,81             | r = 0,005<br>p = 0,83              | r = - 0,10<br>p = 0,70             |
| <b>Time to Maximum (s)</b>  | r = - 0,31<br>p = 0,89 | r = 0,03<br>p = 0,89  | r = 0,09<br>p = 0,67  | r = -0,04<br>p = 0,83            | r = -0,05<br>p = 0,8               | r = -0,18<br>p = 0,48              |
